# Supplementary material for: Spatiotemporal association of DNAJB13 with the annulus during mouse sperm flagellum development
Source: PubMed Central journal article supplement (PMC2670831; doi:10.1186/1471-213x-9-23), 2009-03-19

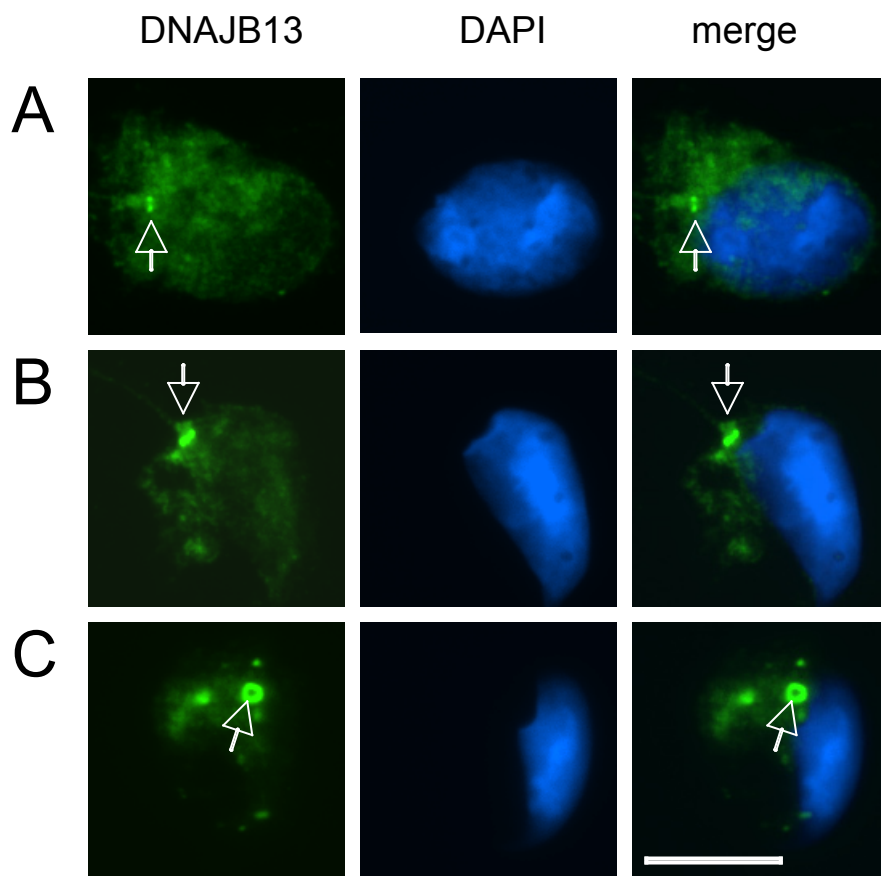

Supplement: 1471-213X-9-23-S2.pdf [file 1471-213X-9-23-S2.pdf]
